# Supplementary material
Source: PubMed Central journal article supplement (PMC6186514)
Supplement: djy024_supp.pdf [file djy024_supp.pdf]

## **Supplementary Methods**

### **Variant Calling, Quality Control and Annotation Pipeline used to analyze the anonymized subset of the cohort.**

Reads were aligned in paired-end mode to the hg19/b37 version of the human genome using BWA-MEM (Burrows-Wheeler Aligner) (1-3). Aligned reads were written to a Sequence Alignment Map (SAM) file, which was then converted into Binary Alignment Map (BAM) format using tools available in Picard (<http://broadinstitute.github.io/picard/>) (4). PCR duplicates were marked for exclusion in subsequent analysis stages using the MarkDuplicates tool in Picard. ABRA, a local aligner, was used to perform a local multiple sequence realignment of reads and remove artefactual SNPs in regions marked with an indel event (5). GATK (Genome Analysis Toolkit) BaseRecalibrator was used to adjust the reported quality scores based on the following covariates: read group, reported quality score, cycle and local sequence context (6). Reassigned quality scores were subject to a threshold of 20. GATK HaplotypeCaller (HTC) was used to call SNVs and Indels simultaneously from the read data. Joint calling was applied to all samples in the anonymized subset of the cohort so as to gather the best joint probabilities for each variant called in the data (7). Samples in this subset of the cohort were anonymized before any variant was annotated, according to the anonymization protocol described below. Subsequent processing of the variants including assigning annotations, QC and filtering based off annotations were then performed.

### **Quality Control/Quality Assurance (QC/QA)**

QC/QA consisted of several steps. The multi-allelic variants (those with more than one alternate allele) were split to individual variants, and each variant was left aligned, such that a parsimonious representation of the alternate allele was maintained. The genotypes with Depth (DP) <20, genotype quality (GQ) GQ<20, Allele Balance (AB) <20% and >80% for heterozygous and AB<80% for homozygous alternative alleles were turned to reference calls. Every variant with at least 10% or more genotypes that underwent changes was removed. The variants with fractions of missing genotypes over 10% were removed. Finally, variants corresponding to known systematic artifacts were removed from the data. QA was done by checking variants for mapping to known genes, performing allele frequency tests for departures from large population frequencies and excess homozygous alleles.

### **Annotation**

VCF files were annotated with public annotators including CAVA, SNPEff, Annovar, ClinVar and public allele frequencies from large sequencing studies like ExAC (without cancer samples from TCGA) and gNOMAD (8-12). Variants with multiple transcripts were prioritized based on their impact using in-house code, and transcript IDs were on par with ClinVar representations.

### **Anonymization Protocol**

For the anonymized subset of the cohort, clinically annotated data was binned, so that no database field contained a unique value and at least 2 individuals remain in any distinct identifiable bin. The BAM files were identified using the BAM labels, temporarily linked by their clinical identifiers. The selected BAMs were then processed as described above, and variants were called. At this stage, a unique set of random alphanumeric values was assigned to each sample. The same alpha-numeric values were also used to replace both the unique clinical identifier in the clinical data file as well as in the variant data file VCF. Finally, any files that carried the original identifiers were destroyed, such that the samples were fully anonymized and could not be linked back to any clinical identifiers.

### **REFERENCES**

1. Li H, Durbin R. Fast and accurate long-read alignment with Burrows-Wheeler transform. *Bioinformatics*. 2010;26(5):589-95.
2. Li H, Durbin R. Fast and accurate short read alignment with Burrows-Wheeler transform. *Bioinformatics*. 2009;25(14):1754-60.
3. Ziemann M. Accuracy, speed and error tolerance of short DNA sequence aligners. bioRxiv. 2016.
4. Li H, Handsaker B, Wysoker A, et al. The Sequence Alignment/Map format and SAMtools. *Bioinformatics*. 2009;25(16):2078-9.
5. Yucel M, Aras B, Yalcinkaya S, et al. Conventional monopolar transurethral resection of prostate in patients with large prostate (>/=80 grams). *Cent European J Urol*. 2013;66(3):303-8.
6. DePristo MA, Banks E, Poplin R, et al. A framework for variation discovery and genotyping using next-generation DNA sequencing data. *Nat Genet*. 2011;43(5):491-8.
7. Hart SN, Maxwell KN, Thomas T, et al. Collaborative science in the next-generation sequencing era: a viewpoint on how to combine exome sequencing data across sites to identify novel disease susceptibility genes. *Brief Bioinform*. 2016;17(4):672-7.
8. Munz M, Ruark E, Renwick A, et al. CSN and CAVA: variant annotation tools for rapid, robust next-generation sequencing analysis in the clinical setting. *Genome Med*. 2015;7:76.
9. Cingolani P, Platts A, Wang le L, et al. A program for annotating and predicting the effects of single nucleotide polymorphisms, SnpEff: SNPs in the genome of *Drosophila melanogaster* strain w1118; iso-2; iso-3. *Fly (Austin)*. 2012;6(2):80-92.
10. Wang K, Li M, Hakonarson H. ANNOVAR: functional annotation of genetic variants from high-throughput sequencing data. *Nucleic Acids Res*. 2010;38(16):e164.
11. Landrum MJ, Lee JM, Riley GR, et al. ClinVar: public archive of relationships among sequence variation and human phenotype. *Nucleic Acids Res*. 2014;42. (Database issue)
12. Lek M, Karczewski KJ, Minikel EV, et al. Analysis of protein-coding genetic variation in 60,706 humans. *Nature*. 2016;536(7616):285-91.

**Supplementary Table 1:** Memorial Sloan Kettering-Integrated Mutation Profiling of Actionable Cancer Targets 76 Gene Panel

|    | <b>Genes</b>         | <b>Disease/Syndromes</b>                                       |
|----|----------------------|----------------------------------------------------------------|
| 1  | ALK                  | Familial neuroblastoma                                         |
| 2  | APC                  | Familial adenomatous polyposis                                 |
| 3  | ATM                  | Ataxia-telangiectasia; ATM-related cancer risk                 |
| 4  | BAP1                 | Mesothelioma, uveal melanoma                                   |
| 5  | BARD1                | Hereditary breast and ovarian cancer syndrome                  |
| 6  | BLM                  | Bloom syndrome                                                 |
| 7  | BMPR1A               | Juvenile polyposis syndrome                                    |
| 8  | BRCA1                | Hereditary breast and ovarian cancer syndrome                  |
| 9  | BRCA2                | Hereditary breast and ovarian cancer syndrome; Fanconi anemia  |
| 10 | BRIP1                | BRIP1-related cancer; Fanconi anemia                           |
| 11 | CDH1                 | Hereditary diffuse gastric cancer                              |
| 12 | CDK4                 | Familial cutaneous melanoma                                    |
| 13 | CDKN2A               | Familial cutaneous melanoma                                    |
| 14 | CHEK2                | CHEK2-related cancer                                           |
| 15 | DICER1               | DICER1-Related Disorders.                                      |
| 16 | EGFR                 | Familial lung cancer                                           |
| 17 | EPCAM                | Lynch syndrome                                                 |
| 18 | FAM175A<br>(ABRAXIS) | Hereditary breast cancer syndrome                              |
| 19 | FH                   | Hereditary Leiomyomatosis and Renal Cell Cancer                |
| 20 | FLCN                 | Birt-Hogg-Dubé syndrome                                        |
| 21 | GATA2                | Familial MDS-AML                                               |
| 22 | GREM1                | Hereditary mixed polyposis syndrome (HMPS)                     |
| 23 | HRAS                 | Costello syndrome                                              |
| 24 | JAK2                 | Familial thrombocytosis                                        |
| 25 | KIT                  | Hereditary Gastrointestinal stromal tumors (GISTs)             |
| 26 | KRAS                 | Noonan Syndrome                                                |
| 27 | MAX                  | Hereditary paraganglioma-pheochromocytoma (PGL/PCC) syndromes  |
| 28 | MEN1                 | Multiple endocrine neoplasia, type 1                           |
| 29 | MET                  | Hereditary papillary renal carcinoma                           |
| 30 | MITF                 | Familial melanoma and renal cell carcinoma                     |
| 31 | MLH1                 | Lynch syndrome                                                 |
| 32 | MRE11A               | Ataxia-telangiectasia-like disorder (recessive); breast cancer |
| 33 | MSH2                 | Lynch syndrome                                                 |
| 34 | MSH6                 | Lynch syndrome                                                 |
| 35 | MUTYH                | MUTYH-associated polyposis (MAP)                               |
| 36 | NBN                  | Nijmegen breakage syndrome; NBN-related cancer risk            |
| 37 | NF1                  | Neurofibromatosis, type 1                                      |
| 38 | NF2                  | Neurofibromatosis, type 2                                      |
| 39 | NRAS                 | Autoimmune lymphoproliferative syndrome (ALPS)                 |
| 40 | PALB2                | PALB2-related cancer; Fanconi anemia                           |
| 41 | PAX5                 | B cell precursor acute lymphoblastic leukemia (B-ALL)          |

|    |         |                                                                                                                                            |
|----|---------|--------------------------------------------------------------------------------------------------------------------------------------------|
| 42 | PDGFRA  | Hereditary Gastrointestinal stromal tumors (GISTs)                                                                                         |
| 43 | PHOX2B  | Familial neuroblastoma; Congenital central hypoventilation syndrome (CCHS)                                                                 |
| 44 | PMS2    | Lynch syndrome                                                                                                                             |
| 45 | POLE    | Colorectal cancer and Endometrial cancer                                                                                                   |
| 46 | PTCH1   | Nevoid basal cell carcinoma syndrome (NBCCS)                                                                                               |
| 47 | PTEN    | PTEN hamartoma tumor syndrome                                                                                                              |
| 48 | RAD50   | Nijmegen breakage syndrome-like disorder                                                                                                   |
| 49 | RAD51   | Hereditary breast cancer                                                                                                                   |
| 50 | RAD51B  | Hereditary breast cancer                                                                                                                   |
| 51 | RAD51C  | RAD51C-related cancer; Fanconi anemia                                                                                                      |
| 52 | RAD51D  | Hereditary ovarian cancer                                                                                                                  |
| 53 | RB1     | Retinoblastoma                                                                                                                             |
| 54 | RECQL4  | Rothmund-Thomson syndrome (RTS)                                                                                                            |
| 55 | RET     | Multiple endocrine neoplasia, type 2                                                                                                       |
| 56 | RUNX1   | Familial platelet disorder with predisposition to acute myelogenous leukaemia                                                              |
| 57 | SDHA    | Hereditary paraganglioma-pheochromocytoma (PGL/PCC) syndromes                                                                              |
| 58 | SDHAF2  | Hereditary paraganglioma-pheochromocytoma (PGL/PCC) syndromes                                                                              |
| 59 | SDHB    | Hereditary paraganglioma-pheochromocytoma (PGL/PCC) syndromes                                                                              |
| 60 | SDHC    | Hereditary paraganglioma-pheochromocytoma (PGL/PCC) syndromes                                                                              |
| 61 | SDHD    | Hereditary paraganglioma-pheochromocytoma (PGL/PCC) syndromes                                                                              |
| 62 | SMAD3   | Thoracic aortic aneurysms and aortic dissections (TAAD)                                                                                    |
| 63 | SMAD4   | Juvenile polyposis syndrome                                                                                                                |
| 64 | SMARCA4 | Rhabdoid tumor predisposition syndrome type 2                                                                                              |
| 65 | SMARCB1 | Rhabdoid tumor predisposition syndrome type 1                                                                                              |
| 66 | STK11   | Peutz-Jeghers syndrome                                                                                                                     |
| 67 | SUFU    | Medulloblastoma                                                                                                                            |
| 68 | TERT    | Familial pulmonary fibrosis (FPF); Dyskeratosis congenita (DC)                                                                             |
| 69 | TGFBR1  | Thoracic aortic aneurysms and aortic dissections (TAAD)                                                                                    |
| 70 | TGFBR2  | Thoracic aortic aneurysms and aortic dissections (TAAD)                                                                                    |
| 71 | TMEM127 | Familial pheochromocytoma syndrome                                                                                                         |
| 72 | TP53    | Li-Fraumeni syndrome                                                                                                                       |
| 73 | TSC1    | Tuberous sclerosis complex (TSC)                                                                                                           |
| 74 | TSC2    | Tuberous sclerosis complex (TSC)                                                                                                           |
| 75 | VHL     | Von Hippel-Lindau syndrome; Familial erythrocytosis, type 2                                                                                |
| 76 | WT1     | WAGR (Wilms tumor-aniridia-genital anomalies-retardation) syndrome, Denys-Drash syndrome (DDS), Frasier syndrome, and isolated Wilms tumor |

**Supplementary Table 2: Demographics and Clinical Characteristics of Identified *BRCA* Patients\***

| <b>Clinical Characteristics</b>        | <b>N=32</b> | <b>BRCA1<br/>N=10</b> | <b>BRCA2<br/>N= 22</b> |
|----------------------------------------|-------------|-----------------------|------------------------|
| <b>Age at diagnosis (years)</b>        |             |                       |                        |
| < 40                                   | 3 (9.3%)    | 2 (66.7%)             | 1 (33.3%)              |
| 40-50                                  | 6 (18.8%)   | 2 (33.3%)             | 4 (66.7%)              |
| 51-60                                  | 9 (28.1%)   | 4 (44.4%)             | 5 (55.6%)              |
| 61-70                                  | 9 (28.1%)   | 2 (20.0%)             | 7 (80.0%)              |
| 71-80                                  | 5 (15.6%)   | —                     | 5 (100.0%)             |
| >80                                    | —           | —                     | —                      |
| <b>Median age at diagnosis (years)</b> | 59          | 54                    | 60                     |
| <b>Sex</b>                             |             |                       |                        |
| Male                                   | 19 (59.4%)  | 7 (36.8%)             | 12 (63.2%)             |
| Female                                 | 13 (40.6%)  | 3 (23.2%)             | 10 (76.8%)             |
| <b>Race</b>                            |             |                       |                        |
| White                                  | 29 (90.6%)  | 10 (34.5%)            | 19 (65.5%)             |
| Non-Ashkenazi Jewish                   | 14 (48.3%)  | 5 (35.7%)             | 9 (64.3%)              |
| Ashkenazi Jewish                       | 15 (51.7%)  | 5 (33.3%)             | 10 (66.7%)             |
| Black / Hispanic / Latino              | 3 (9.4%)    | —                     | 3 (100.0%)             |
| Asian                                  | —           | —                     | —                      |
| <b>Diabetes</b>                        |             |                       |                        |
| Yes                                    | 5 (15.6%)   | —                     | 5 (100.0%)             |
| No                                     | 27 (84.4%)  | 10 (35.7%)            | 17 (60.7%)             |
| <b>Smoking Status</b>                  |             |                       |                        |
| Yes                                    | 13 (40.6%)  | —                     | 13<br>(100.0%)         |
| No                                     | 19 (59.4%)  | 10 (52.6%)            | 9 (47.4%)              |
| <b>Pathology</b>                       |             |                       |                        |
| Adenocarcinoma                         | 30 (93.8%)  | 9 (30.0%)             | 21 (70.0%)             |
| Adenosquamous carcinoma                | 1 (3.1%)    | —                     | 1 (100.0%)             |
| Acinar cell carcinoma of the pancreas  | 1 (3.1%)    | 1 (100.0%)            | —                      |
| Undifferentiated                       | —           | —                     | —                      |
| MCN/ITPN/MPAC/IPMN/COLLOID/SPNP†       | —           | —                     | —                      |

\*—denotes 0

† (MCN) Mucinous Cystic Neoplasm, (ITPN) Intraductal Tubulopapillary Neoplasm, (MPAC) Mixed pancreatic and Acinar Cell Carcinoma of the Pancreas, (IPMN) Intra-Papillary Mucinous Neoplasm, (COLLOID) Colloid Intraductal Papillary Mucinous Neoplasm, (SPNP) Solid Pseudopapillary Neoplasm of the Pancreas

**Supplementary Table 3:** Specific Mutations, Founder Status, Clinical Details and Guidelines Met in *BRCA* Patients

| Gene                                | Sex, Median Age at Diagnosis (range) | N= | Founder mutation | 1 <sup>st</sup> /2 <sup>nd</sup> degree with cancer | Guidelines Met*                                            | Stage at Diagnosis       |
|-------------------------------------|--------------------------------------|----|------------------|-----------------------------------------------------|------------------------------------------------------------|--------------------------|
| <b>BRCA1 (n=10)</b>                 |                                      |    |                  |                                                     |                                                            |                          |
| c.427G>T (p.Glu143*)                | M:F 7:3<br>64 yrs<br>(32-68)         | 1  | N                | Breast, PDAC                                        | HBOC                                                       | IV                       |
| c.4986+5G>A                         |                                      | 1  | N                | PDAC                                                | HBOC                                                       | III                      |
| c.5266dupC (p.Gln1756Profs*74)      |                                      | 2  | Y                | PDAC, breast, ovary                                 | HBOC (2/2 patients), LS (1/2 patients), FPC (1/2 patients) | IV, IV                   |
| c.65T>C (p.Leu22Ser)                |                                      | 1  | N                | Ovary, prostate                                     | HBOC                                                       | IV                       |
| c.4524G>A (p.Trp1508*)              |                                      | 1  | N                | Breast                                              | HBOC                                                       | IIB                      |
| c.68_69delAG (p.Glu23Valfs*17)      |                                      | 3  | Y                | Colon, breast, stomach                              | HBOC (3/3 patients)                                        | IIB, IV, IV              |
| c.181T>G (p.Cys61Gly)               |                                      | 1  | Y                | Laryngeal                                           | HBOC                                                       | IV                       |
| <b>BRCA2 (n=18)</b>                 |                                      |    |                  |                                                     |                                                            |                          |
| c.5946delT (p.Ser1982Argfs*22)      | M:F 9:9<br>60 yrs<br>(37-77)         | 9  | Y                | Breast, ovary, CRC                                  | HBOC (9/9 patients), FPC (2/9 patients)                    | IV (6), IIB (2), IIA (1) |
| c.4829_4830delTG (p.Val1610Glyfs*4) |                                      | 1  | N                | Tonsil, endometrial                                 | N                                                          | IIA                      |
| c.5569delG (p.Glu1857Lysfs*6)       |                                      | 1  | N                | HCC, PDAC                                           | N                                                          | IV                       |
| c.4638delT (p.Phe1546Leufs*22)      |                                      | 1  | N                | Melanoma                                            | N                                                          | IV                       |
| c.793+1G>A                          |                                      | 1  | N                | Breast, CRC                                         | LS                                                         | IIB                      |
| c.9371A>T (p.Asn3124Ile)            |                                      | 1  | Y                | Breast                                              | HBOC                                                       | IV                       |
| c.5614A>T (p.Lys1872*)              |                                      | 1  | N                | Breast                                              | HBOC                                                       | IV                       |
| c.6259delA (p.Arg2087Glufs*32)      |                                      | 1  | N                | Breast                                              | HBOC                                                       | IV                       |
| c.3847_3848del (p.Val1283Lysfs*2)   |                                      | 1  | N                | Gastric                                             | HBOC                                                       | IIA                      |

|                                                                                                         |                              |           |                         |                                                         |                        |                           |
|---------------------------------------------------------------------------------------------------------|------------------------------|-----------|-------------------------|---------------------------------------------------------|------------------------|---------------------------|
| c.3264dupT<br>(p.Gln1089Serfs*10)                                                                       |                              | 1         | N                       | Breast                                                  | HBOC                   | IV                        |
| <b>Gene</b>                                                                                             | <b>Sex, Age at Diagnosis</b> | <b>N=</b> | <b>Founder mutation</b> | <b>1<sup>st</sup>/2<sup>nd</sup> degree with cancer</b> | <b>Guidelines Met*</b> | <b>Stage at Diagnosis</b> |
| <b>BRCA2 + CHEK2</b> -<br>c.5946delT<br>(p.Ser1982Argfs*22) +<br>c.1283C>T<br>(p.Ser428Phe)             | 50, M                        | 1         | Y                       | Prostate,<br>Breast, Gastric                            | HBOC                   | IV                        |
| <b>BRCA2 + CHEK2</b> -<br>c.9148C>T (p.Gln3050*)<br>+ c.1283C>T<br>(p.Ser428Phe)                        | 60, F                        | 1         | N                       | Breast                                                  | HBOC                   | IIA                       |
| <b>BRCA2 + APC</b> -<br>c.5946delT<br>(p.Ser1982Argfs*22) +<br>c.3920T>A<br>(p.Ile1307Lys)              | 64, M                        | 1         | N                       | Breast, PDAC,<br>Cervical,<br>Ovarian, Lung             | HBOC, FPC, LS          | IV                        |
| <b>BRCA2 + PMS2</b> -<br>c.6468_6469del<br>(p.Gln2157Ilefs*18) +<br>c.1831delinsTT<br>(p.Ile611Phefs*2) | 74, M                        | 1         | Y                       | Bladder,<br>Lymphoma,<br>Testicular                     | N                      | IIA                       |

\* NCCN: The National Comprehensive Cancer Network, HBOC: Hereditary Breast Ovary Cancer, ACMG: American College of Medical Genetics and Genomics, FPC: Familial Pancreatic Cancer, LS: Lynch Syndrome

**Supplementary Table 4:** Pathogenic Germline Alteration Screening Guidelines Met by *BRCA* Patients\*

| Guidelines Met (NCCN HBOC, ACMG: HBOC, Pancreatic, LS, FAMM) † |           |           | Total      |
|----------------------------------------------------------------|-----------|-----------|------------|
|                                                                | BRCA 1    | BRCA 2    |            |
| 0                                                              | —         | 5 (22.7%) | 5 (15.6%)  |
| 1                                                              | 2 (20.0%) | 3 (13.6%) | 5 (15.6%)  |
| 2                                                              | 6 (60.0%) | 9 (40.9%) | 15 (46.9%) |
| 3                                                              | 2 (20.0%) | 4 (18.2)  | 6 (18.8%)  |
| 4                                                              | —         | 1 (4.6%)  | 1 (3.1%)   |
| 5                                                              | —         | —         | —          |
| <b>Total</b>                                                   | <b>10</b> | <b>22</b> | <b>32</b>  |

\*—denotes 0

†NCCN: The National Comprehensive Cancer Network, HBOC: Hereditary Breast Ovary Cancer, ACMG: American College of Medical Genetics and Genomics, Pancreatic: Familial Pancreatic Cancer, LS: Lynch Syndrome, FAMM: Familial Atypical Multiple Mole Melanoma Syndrome



**Supplementary Table 5: BRCA Mutations Detailed and Response to Platinum\***

| Gene                                                  | N= | Received Platinum | Response   | Overall Survival (Months, Median) |
|-------------------------------------------------------|----|-------------------|------------|-----------------------------------|
| <b>BRCA2</b>                                          | 18 | 15 (83.3%)        | 12 (80.0%) | 18                                |
| c.5946delT (p.Ser1982Argfs*22)                        | 9  | 9 (100.0%)        | 6 (67%)    | 20                                |
| c.4829_4830delTG (p.Val1610Glyfs*4)                   | 1  | —                 | NA         | 40                                |
| c.5569delG (p.Glu1857Lysfs*6)                         | 1  | 1 (100.0%)        | 1 (100.0%) | 23                                |
| c.4638delT (p.Phe1546Leufs*22)                        | 1  | 1 (100.0%)        | 1 (100.0%) | 10                                |
| c.793+1G>A                                            | 1  | 1 (100.0%)        | —          | 11                                |
| c.9371A>T (p.Asn3124Ile)                              | 1  | —                 | —          | 2                                 |
| c.5614A>T (p.Lys1872*)                                | 1  | 1 (100.0%)        | 1 (100.0%) | 15                                |
| c.6259delA (p.Arg2087Glyfs*32)                        | 1  | 1 (100.0%)        | 1 (100.0%) | 16                                |
| c.3847_3848del (p.Val1283Lysfs*2)                     | 1  | 1 (100.0%)        | 1 (100.0%) | 61                                |
| c.3264dupT (p.Gln1089Serfs*10)                        | 1  | 1 (100.0%)        | 1 (100.0%) | 3                                 |
| Gene                                                  | N= | Received Platinum | Response   | Overall Survival (Months, Median) |
| <b>BRCA2 +</b>                                        | 4  | 1 (100.0%)        | 1 (100.0%) | 35                                |
| <i>BRCA2 + CHEK2</i> (c.5946delT + c.1283C>T)         | 1  | —                 | —          | 58                                |
| <i>BRCA2 + CHEK2</i> (c.9148C>T + c.1283C>T)          | 1  | —                 | —          | 15                                |
| <i>BRCA2 + APC</i> (c.5946delT + c.3920T>A)           | 1  | 1 (100.0%)        | 1 (100.0%) | 30                                |
| <i>BRCA2 + PMS2</i> (c.6468_6469del + c.1831delinsTT) | 1  |                   |            | 39                                |
| Gene                                                  | N= | Received Platinum | Response   | Overall Survival (Months, Median) |
| <b>BRCA1</b>                                          | 10 | 7 (70.0%)         | 6 (85.7%)  | 20                                |
| c.427G>T (p.Glu143*)                                  | 1  | 1 (100.0%)        | 1 (100.0%) | 23                                |
| c.4986+5G>A                                           | 1  | 1 (100.0%)        | 1 (100.0%) | 51                                |
| c.5266dupC (p.Gln1756Profs*74)                        | 2  | 2 (100.0%)        | 1 (50.0%)  | 16                                |
| c.65T>C (p.Leu22Ser)                                  | 1  | —                 | —          | 11                                |
| c.4524G>A (p.Trp1508*)                                | 1  | —                 | —          | 85                                |
| c.68_69delAG (p.Glu23Valfs*17)                        | 3  | 2 (67%)           | 2 (100%)   | 3                                 |
| c.181T>G (p.Cys61Gly)                                 | 1  | 1 (100%)          | 1 (100%)   | 53                                |

\*—denotes 0

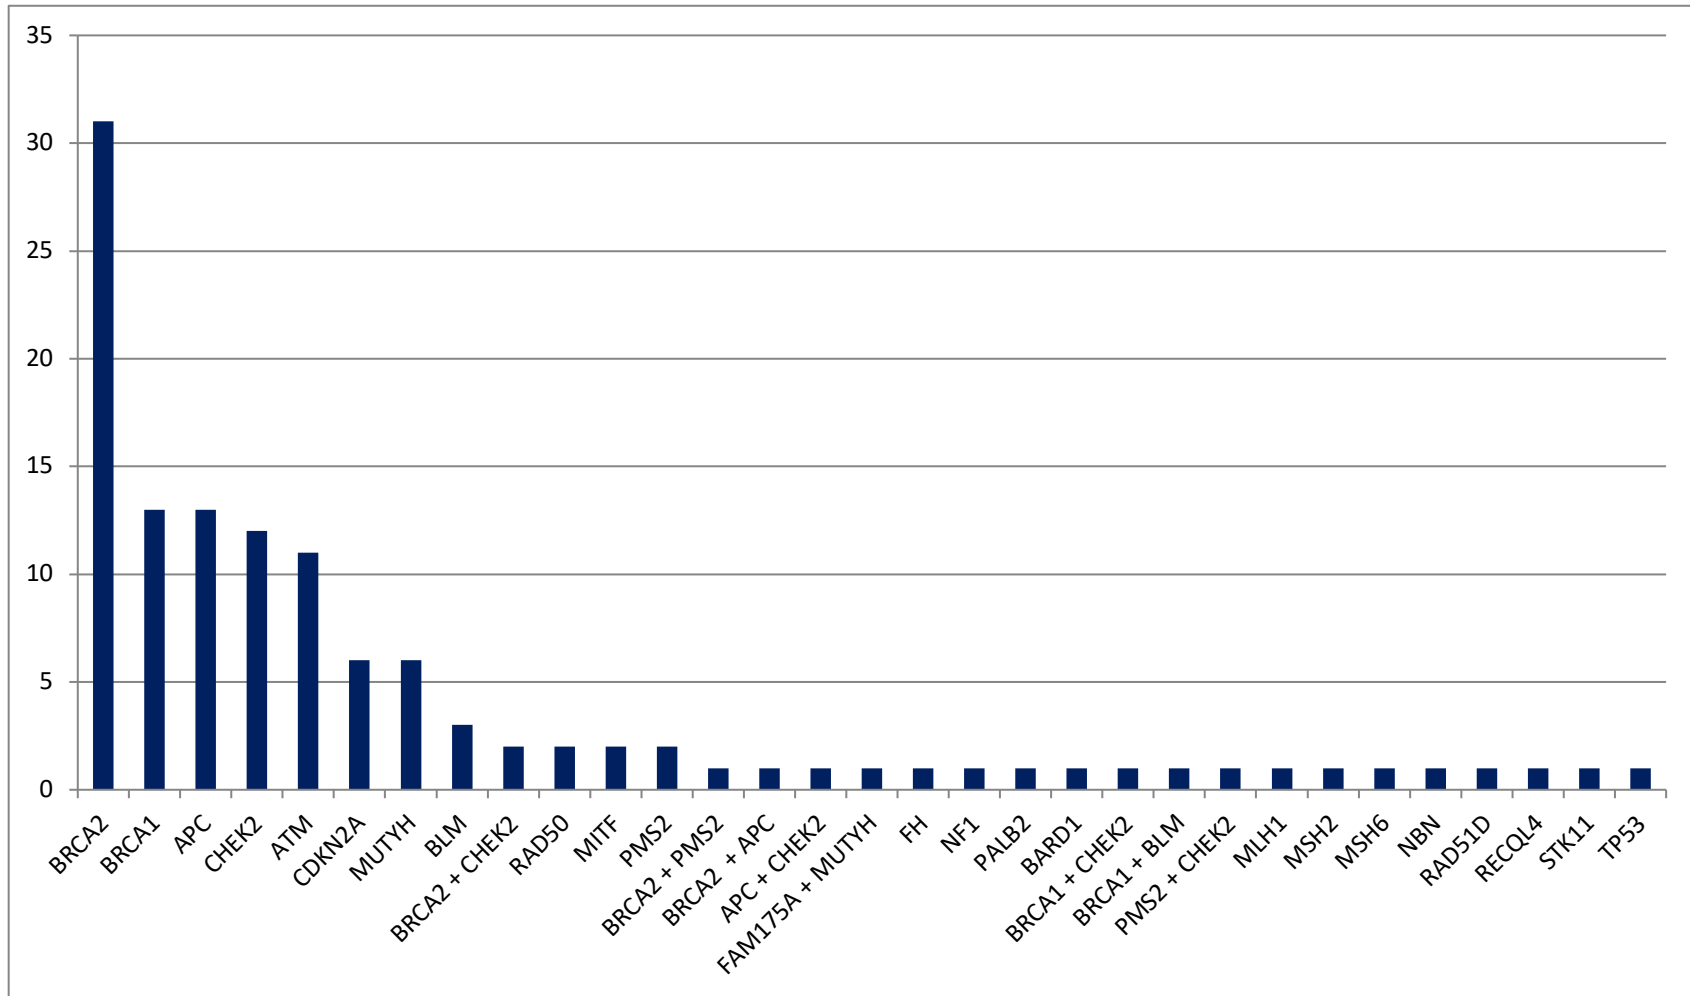

**Supplementary Figure 1:** Spectrum of Pathogenic Germlines Alterations Identified in Entire N= 615 Patient Cohort

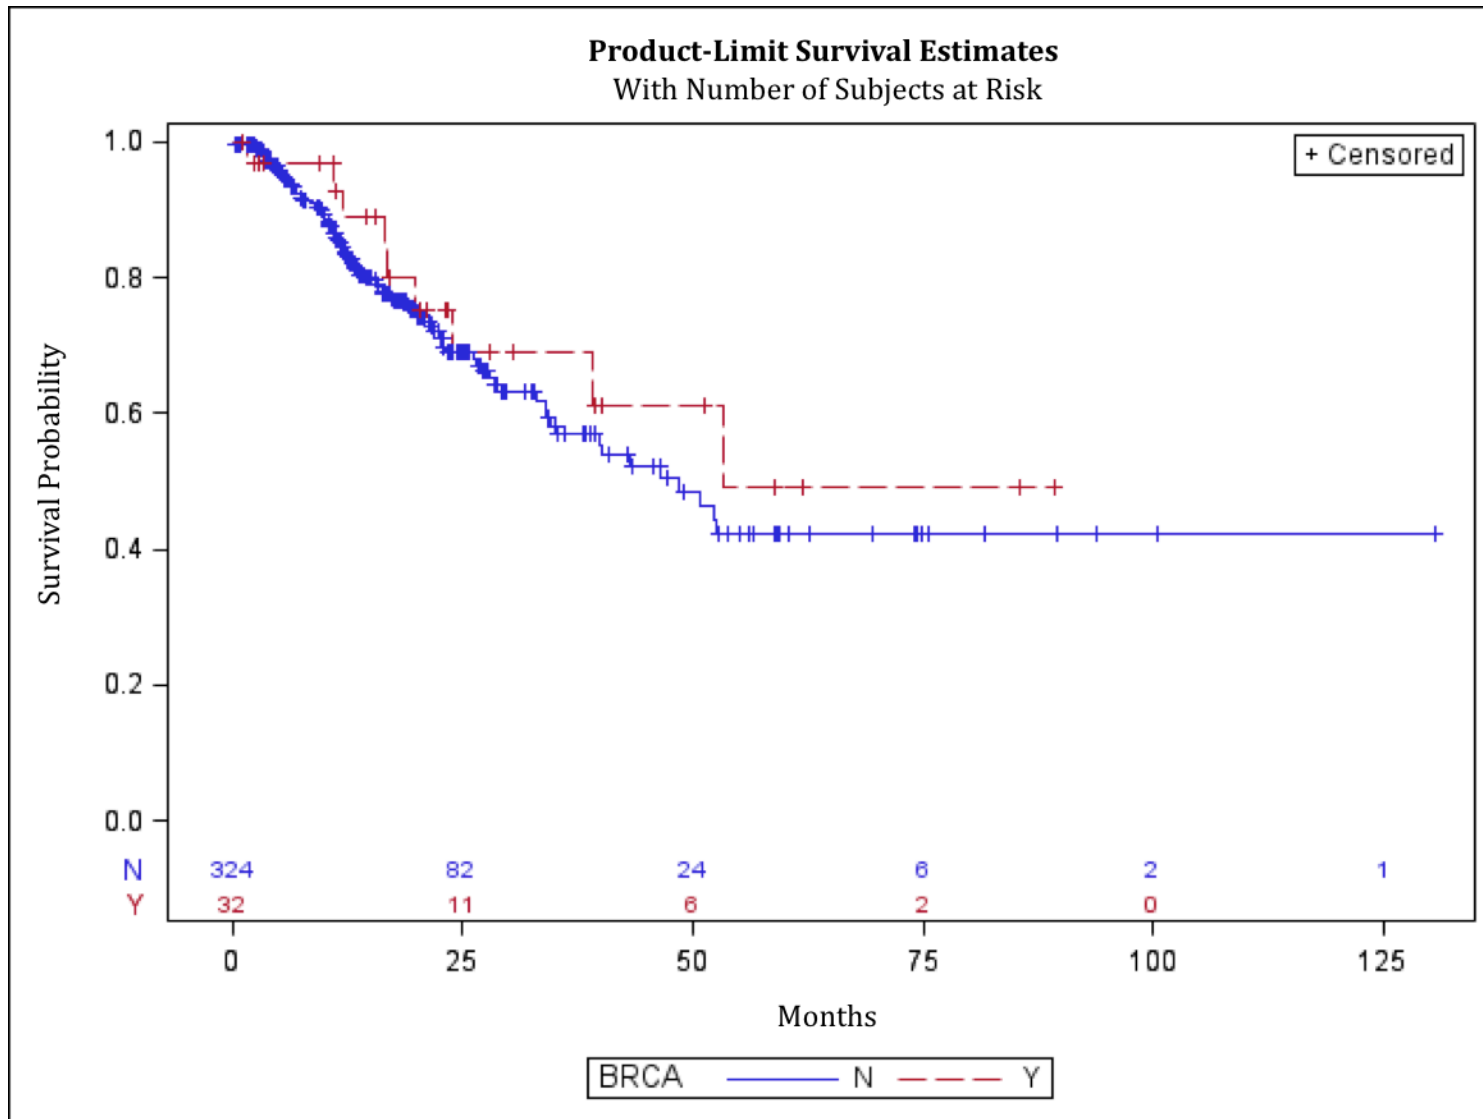

**Supplementary Figure 2:** Kaplan Meyer Curve for N=356 Patients who consented to Germline Testing with and without *BRCA1/2* Mutations from Diagnosis. 324 patients without *BRCA* and 32 patients with *BRCA*.

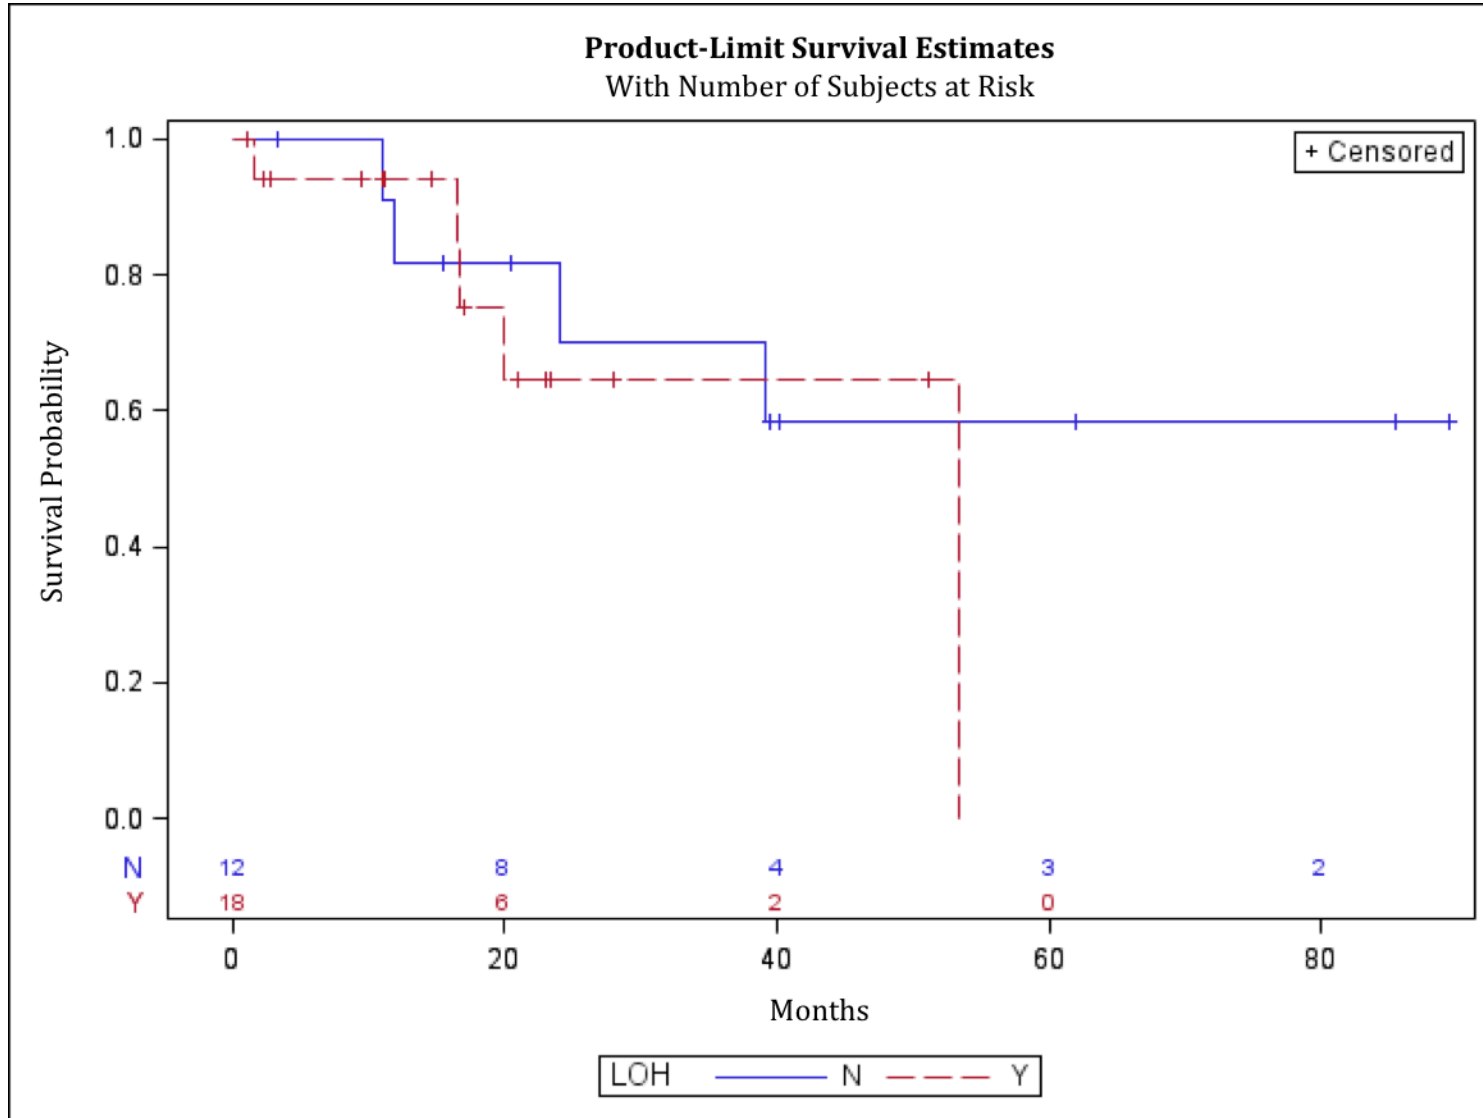

**Supplementary Figure 3:** Kaplan Meyer Curve for N=30 Patients with *BRCA1/2* Mutations with and without Loss of Heterozygosity from Diagnosis Date. 18 patients with Loss of Heterozygosity and 12 patients without.
